# Supplementary material
Source: publisher site journal article supplement (https://www.dovepress.com/article/338349)
Supplement: Supplementary file 1 [file get_supplementary_file.php]

# **Strategy for avoiding protein corona inhibition of targeted drug delivery by linking recombinant affibody scaffold to magnetosomes**

Shijiao Ma<sup>1</sup>, Chenchen Gu<sup>1</sup>, Junjie Xu<sup>1</sup>, Jinxin He<sup>2</sup>, Shuli Li<sup>1</sup>, Haolan Zheng<sup>1</sup>, Bo Pang<sup>1</sup>, Ying Wen<sup>1</sup>, Qiaojun Fang<sup>3</sup>, Weiquan Liu<sup>1\*</sup>, Jiesheng Tian<sup>1\*</sup>

<sup>1</sup>State Key Laboratory of Agrobiotechnology, College of Biological Sciences, China Agricultural University, Beijing 100193, People's Republic of China.

<sup>2</sup>College of Veterinary Medicine, Shanxi Agriculture University, Taigu, Shanxi, 030801, People's Republic of China.

<sup>3</sup>CAS Key Laboratory for Biomedical Effects of Nanomaterials and Nanosafety, CAS Center for Excellence in Nanoscience, National Center for Nanoscience and Technology, Beijing 100190, People's Republic of China.

\*Correspondence:

Weiquan Liu, E-mail: [weiquan8@cau.edu.cn](mailto:weiquan8@cau.edu.cn), Tel/Fax: 8610-62732676

Jiesheng Tian, E-mail: [tianhome@cau.edu.cn](mailto:tianhome@cau.edu.cn), Tel/Fax: 8610-62731440

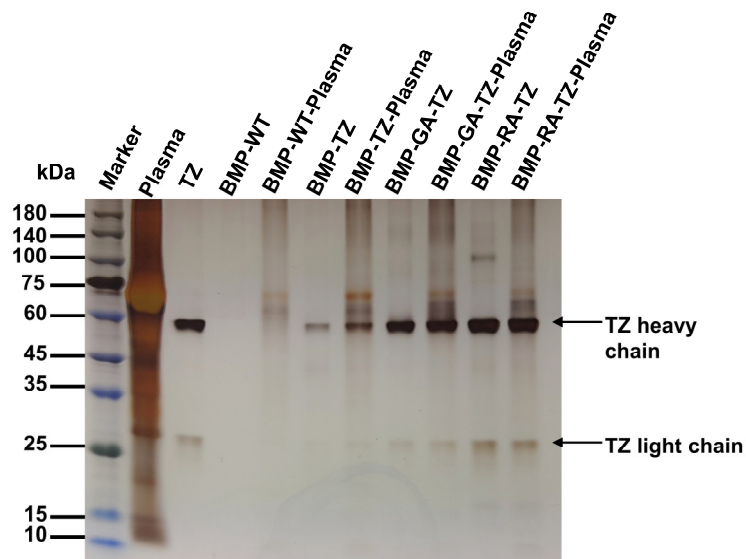

**Figure S1.** BMP-WT, BMP-GA-TZ, and BMP-RA-TZ were incubated with plasma, and obtained proteins were separated by SDS-PAGE.

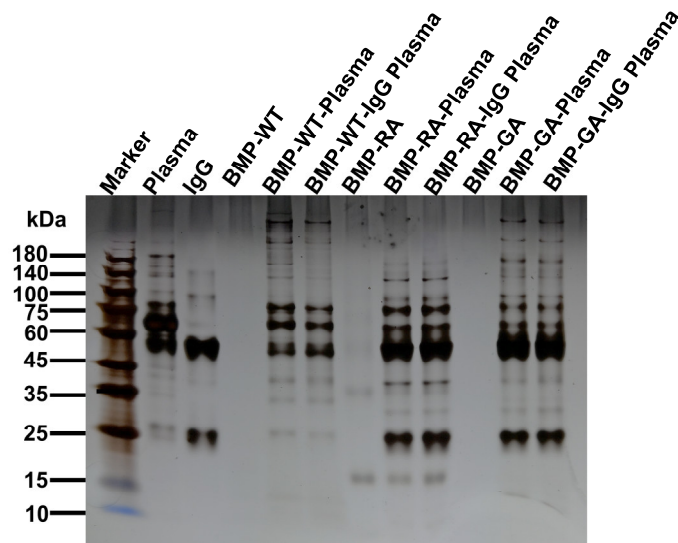

**Figure S2.** BMP-RA and BMP-GA were incubated with plasma, and obtained proteins were separated by SDS-PAGE.

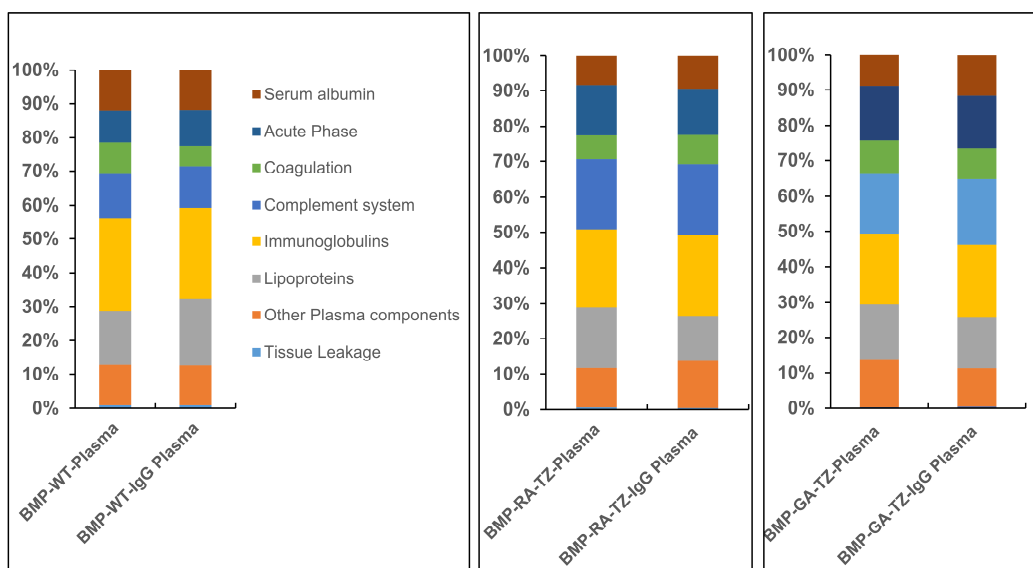

**Figure S3.** LC-MS analysis, and classification of corona proteins. For protein corona analysis, BMPs were incubated with 100% human plasma for 2 h. Values are expressed as percentages relative to total amount of all identified proteins.

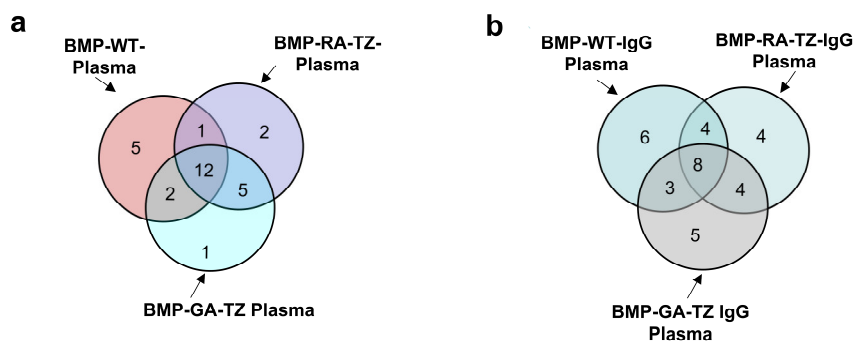

**Figure S4.** Overlap of protein identifications from BMPs incubated with plasma (a) or IgG plasma (b) by LC-MS/MS analysis.

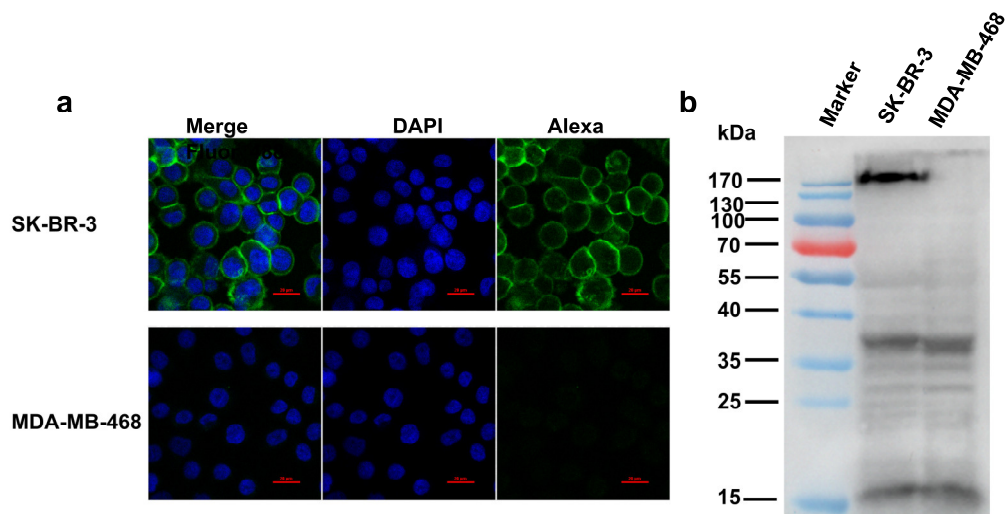

**Figure S5.** Immunofluorescence (a) and Western blotting (b) analysis of HER2 expression on SK-BR-3 and MDA-MB-468 cells.

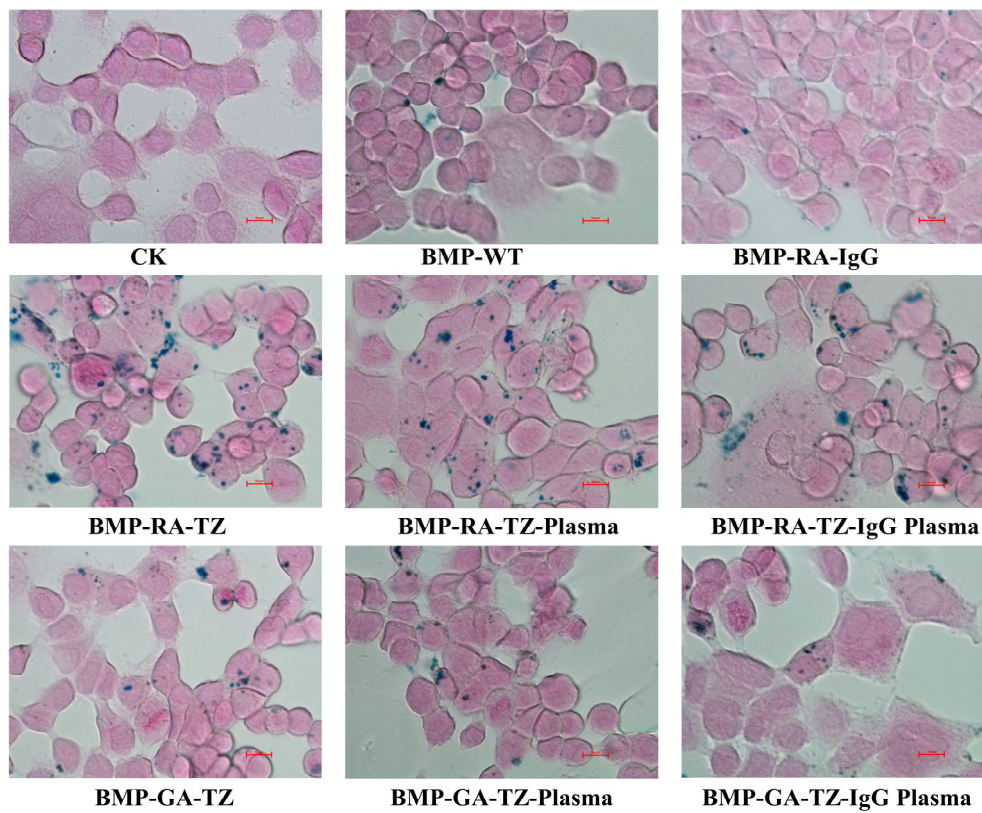

**Figure S6.** Prussian blue staining of iron in SK-BR-3 cells.

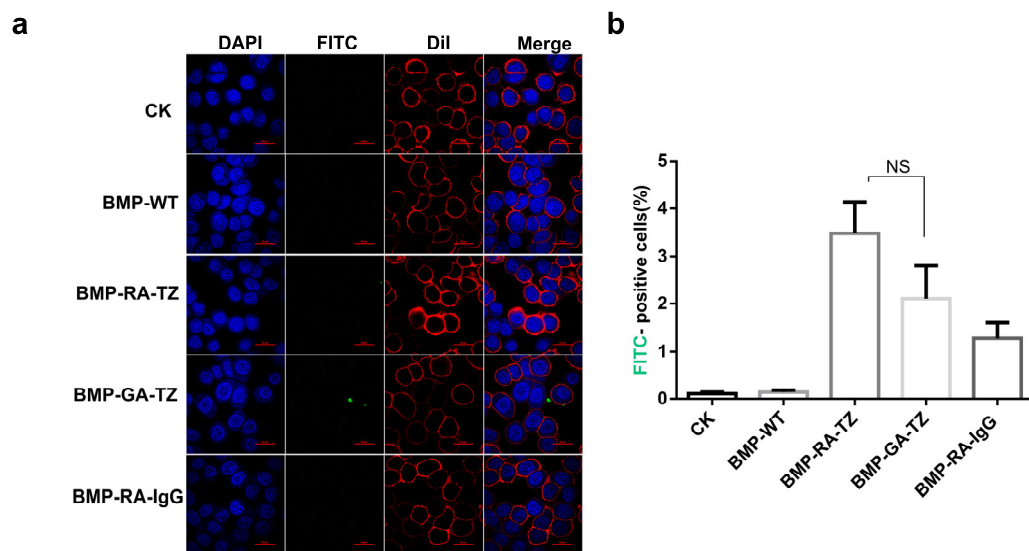

**Figure S7. (a)** CLSM imaging of MDA-MB-468 cells incubated with BMP-RA-TZ or BMP-GA-TZ. **(b)** Percentages (by flow cytometry) of FITC-positive cells for various conditions, (n=3).

**Table S1.** Twenty most abundant plasma proteins adsorbed on BMPs, identified by LC-MS/MS analysis. (1: % BMP-WT-Plasma. 2: % BMP-WT-IgG Plasma. 3: % BMP-RA-TZ-Plasma. 4: % BMP-RA-TZ-IgG Plasma. 5: % BMP-GA-TZ-Plasma. 6: % BMP-GA-TZ-IgG Plasma)

| Accession  | % coverage | Gene Names | Protein Names                         | 1     | 2     | 3     | 4    | 5    | 6     | MW (kDa) |
|------------|------------|------------|---------------------------------------|-------|-------|-------|------|------|-------|----------|
| P02768     | 54         | ALB        | Albumin                               | 12.98 | 11.52 | 8.65  | 9.46 | 8.61 | 17.68 | 47.36    |
| P02649     | 53         | APOE       | Apolipoprotein E                      | 5.2   | 6.89  | 4.28  | 2.52 | 3.04 | 3.08  | 36.15    |
| P02787     | 42         | TF         | Serotransferrin                       | 4.97  | 3.63  | 2.74  | 2.99 | 4.75 | 3.62  | 77.06    |
| A0A075B6K9 | 62         | IGLC2      | Immunoglobulin lambda constant 2      | 4.77  | 2.71  | 3.98  | 3.06 | 2.78 | 1.21  | 11.29    |
| P02647     | 43         | APOA1      | Apolipoprotein A-I                    | 4.73  | 7.1   | 6.6   | 4.89 | 5.19 | 5.48  | 30.78    |
| P01767     | 25         | IGHV3-53   | Immunoglobulin heavy variable 3-53    | 4.1   | 3.64  | 2.27  | 1.72 | 1.56 | 1.06  | 12.77    |
| P00738     | 38         | HP         | Haptoglobin                           | 4.09  | 1.73  | 2.01  | 0.85 | 2.61 | 3.09  | 45.21    |
| K7ERI9     | 25         | APOC1      | Apolipoprotein C-I                    | 2.98  | 4.71  | 2.95  | 0.96 | 1.74 | 2.12  | 8.65     |
| P01619     | 23         | IGKV3-20   | Immunoglobulin kappa variable 3-20    | 2.95  | 2.61  | 0.99  | 1.89 | 1.72 | 1.17  | 12.56    |
| P01625     | 42         | IGKV4-1    | Immunoglobulin kappa variable 4-1     | 2.55  | 1.4   | 1.41  | 1.64 | 1.49 | 1.01  | 13.38    |
| P02749     | 41         | APOH       | Beta-2-glycoprotein 1                 | 2.49  | 2.21  | 1.01  | 0.68 | 1.46 | 1.5   | 38.3     |
| P01024     | 32         | C3         | Complement C3                         | 2.44  | 2.38  | 5.12  | 5    | 3.91 | 3.68  | 187.15   |
| Q03591     | 32         | CFHR1      | Complement factor H-related protein 1 | 1.9   | 1.98  | 1.23  | 1.17 | 0.86 | 0.88  | 37.65    |
| O43866     | 33         | CD5L       | CD5 antigen-like                      | 1.83  | 0.6   | 0.59  | 1    | 0.62 | 1.94  | 38.01    |
| P02675     | 34         | FGB        | Fibrinogen beta chain                 | 1.78  | 1.09  | 1.369 | 1.75 | 1.6  | 1.2   | 55.93    |
| A0A0A0MSV6 | 22         | C1QB       | Complement C1q subcomponent subunit B | 1.76  | 2.02  | 1.599 | 2.3  | 1.69 | 1.77  | 24.03    |
| P01608     | 24         | IGKV1D-33  | Immunoglobulin kappa variable 1D-33   | 1.76  | 1.57  | 1.59  | 1.13 | 1.03 | 0.7   | 12.85    |
| P04208     | 37         | IGLV1-47   | Immunoglobulin lambda variable 1-47   | 1.76  | 1.57  | 0.97  | 0.62 | 0.57 | 0.39  | 12.28    |
| P02747     | 26         | C1QC       | Complement C1q subcomponent subunit C | 1.57  | 1.407 | 0.66  | 0.56 | 0.7  | 0.63  | 25.77    |
| A0A0C4DH36 | 25         | IGHV3-38   | immunoglobulin heavy variable 3-38    | 1.56  | 1.387 | 0.48  | 0.24 | 0.48 | 0.35  | 12.76    |

**Table S2.** The classification of Proteins adsorbed on the surface of BMPs.

| BMP-WT-Plasma |             |       | BMP-WT-IgG Plasma |             |       | BMP-RA-TZ-Plasma |             |       | BMP-RA-TZ-IgG Plasma |             |       | BMP-GA-TZ-Plasma |             |       | BMP-GA-TZ-IgG Plasma |             |       |
|---------------|-------------|-------|-------------------|-------------|-------|------------------|-------------|-------|----------------------|-------------|-------|------------------|-------------|-------|----------------------|-------------|-------|
| Accession     | Annotation  | mol % | Accession         | Annotation  | mol % | Accession        | Annotation  | mol % | Accession            | Annotation  | mol % | Accession        | Annotation  | mol % | Accession            | Annotation  | mol % |
| P00738        | Acute Phase | 4.09  | P05109            | Acute Phase | 1.80  | P01009           | Acute Phase | 3.69  | P05109               | Acute Phase | 2.18  | P01009           | Acute Phase | 4.33  | P00738               | Acute Phase | 3.09  |
| O43866        | Acute Phase | 1.83  | P00738            | Acute Phase | 1.73  | P00738           | Acute Phase | 2.01  | P01009               | Acute Phase | 1.77  | P00738           | Acute Phase | 2.61  | P01009               | Acute Phase | 2.65  |
| P05109        | Acute Phase | 1.09  | P00739            | Acute Phase | 1.15  | P05109           | Acute Phase | 1.12  | P01023               | Acute Phase | 1.41  | P01023           | Acute Phase | 1.59  | O43866               | Acute Phase | 1.94  |
| P01023        | Acute Phase | 0.70  | P01009            | Acute Phase | 1.08  | P00450           | Acute Phase | 1.02  | O43866               | Acute Phase | 1.00  | P02751           | Acute Phase | 0.84  | P00739               | Acute Phase | 1.51  |
| J3KNB4        | Acute Phase | 0.50  | P59665            | Acute Phase | 1.01  | P01023           | Acute Phase | 0.96  | P00738               | Acute Phase | 0.85  | P01011           | Acute Phase | 0.80  | P01023               | Acute Phase | 1.15  |
| P59665        | Acute Phase | 0.46  | P02743            | Acute Phase | 0.80  | P10909           | Acute Phase | 0.65  | P00450               | Acute Phase | 0.85  | P00450           | Acute Phase | 0.77  | P00450               | Acute Phase | 0.85  |
| P01011        | Acute Phase | 0.41  | P01023            | Acute Phase | 0.65  | P02751           | Acute Phase | 0.59  | P02751               | Acute Phase | 0.78  | P05109           | Acute Phase | 0.63  | P02751               | Acute Phase | 0.71  |
| P02743        | Acute Phase | 0.38  | O43866            | Acute Phase | 0.60  | O43866           | Acute Phase | 0.59  | P10909               | Acute Phase | 0.75  | O43866           | Acute Phase | 0.62  | P10909               | Acute Phase | 0.46  |
| P00450        | Acute Phase | 0.34  | J3KNB4            | Acute Phase | 0.45  | P02763           | Acute Phase | 0.55  | P02743               | Acute Phase | 0.58  | P02763           | Acute Phase | 0.58  | P05109               | Acute Phase | 0.43  |
| P10909        | Acute Phase | 0.27  | P10909            | Acute Phase | 0.39  | P02743           | Acute Phase | 0.50  | P00739               | Acute Phase | 0.55  | P02743           | Acute Phase | 0.53  | P01011               | Acute Phase | 0.39  |
| P02763        | Acute Phase | 0.18  | A0A075B6H6        | Acute Phase | 0.36  | P01011           | Acute Phase | 0.45  | P01011               | Acute Phase | 0.53  | P10909           | Acute Phase | 0.50  | P02760               | Acute Phase | 0.34  |
| P02751        | Acute Phase | 0.08  | P02763            | Acute Phase | 0.36  | P02760           | Acute Phase | 0.28  | P02760               | Acute Phase | 0.43  | P61626           | Acute Phase | 0.40  | P02765               | Acute Phase | 0.34  |
| P02675        | Coagulation | 1.78  | P02751            | Acute Phase | 0.07  | P59665           | Acute Phase | 0.25  | P02763               | Acute Phase | 0.43  | P02760           | Acute Phase | 0.21  | P02763               | Acute Phase | 0.26  |
| P02671        | Coagulation | 1.00  | P02675            | Coagulation | 1.09  | P02765           | Acute Phase | 0.20  | J3KNB4               | Acute Phase | 0.32  | P08697           | Acute Phase | 0.20  | P02743               | Acute Phase | 0.24  |
| P03951        | Coagulation | 0.99  | P02671            | Coagulation | 0.89  | J3KNB4           | Acute Phase | 0.12  | P08697               | Acute Phase | 0.19  | P02765           | Acute Phase | 0.13  | P59665               | Acute Phase | 0.18  |
| P01042        | Coagulation | 0.97  | P03951            | Coagulation | 0.59  | Q96PD5           | Acute Phase | 0.04  | P02765               | Acute Phase | 0.14  | J3KNB4           | Acute Phase | 0.13  | P08697               | Acute Phase | 0.16  |
| P00747        | Coagulation | 0.78  | P01042            | Coagulation | 0.58  | P00734           | Coagulation | 1.54  | Q96PD5               | Acute Phase | 0.09  | A0A096LPE2       | Acute Phase | 0.11  | J3KNB4               | Acute Phase | 0.09  |
| H0YAC1        | Coagulation | 0.60  | P00747            | Coagulation | 0.56  | P02675           | Coagulation | 1.36  | P02675               | Coagulation | 1.75  | Q96PD5           | Acute Phase | 0.08  | P00734               | Coagulation | 2.01  |
| A0A0A0MRJ7    | Coagulation | 0.44  | H0YAC1            | Coagulation | 0.46  | E9PGN7           | Coagulation | 0.71  | P00734               | Coagulation | 1.41  | P02675           | Coagulation | 1.60  | P02675               | Coagulation | 1.20  |
| P00748        | Coagulation | 0.43  | A0A0A0MRJ7        | Coagulation | 0.36  | P02671           | Coagulation | 0.71  | P00747               | Coagulation | 0.92  | P00734           | Coagulation | 1.39  | P00747               | Coagulation | 0.92  |
| E9PGN7        | Coagulation | 0.41  | P00748            | Coagulation | 0.30  | G5E9F8           | Coagulation | 0.52  | G5E9F8               | Coagulation | 0.79  | P02671           | Coagulation | 1.14  | G5E9F8               | Coagulation | 0.76  |
| P00734        | Coagulation | 0.26  | E9PGN7            | Coagulation | 0.28  | P00747           | Coagulation | 0.52  | P02671               | Coagulation | 0.76  | E9PGN7           | Coagulation | 0.96  | P02671               | Coagulation | 0.68  |
| P04196        | Coagulation | 0.15  | G5E9F8            | Coagulation | 0.20  | P04196           | Coagulation | 0.46  | E9PGN7               | Coagulation | 0.73  | G5E9F8           | Coagulation | 0.80  | P05155               | Coagulation | 0.65  |
| G5E9F8        | Coagulation | 0.15  | P00734            | Coagulation | 0.18  | P01008           | Coagulation | 0.33  | P04196               | Coagulation | 0.47  | P00747           | Coagulation | 0.78  | P01042               | Coagulation | 0.48  |

|            |                   |      |            |                   |      |            |                   |      |            |                   |      |            |                   |      |            |                   |      |
|------------|-------------------|------|------------|-------------------|------|------------|-------------------|------|------------|-------------------|------|------------|-------------------|------|------------|-------------------|------|
| P01008     | Coagulation       | 0.08 | P01008     | Coagulation       | 0.15 | P01042     | Coagulation       | 0.22 | P01008     | Coagulation       | 0.38 | P04196     | Coagulation       | 0.57 | P04196     | Coagulation       | 0.39 |
| P05546     | Coagulation       | 0.08 | P05546     | Coagulation       | 0.14 | A0A0A0MRJ7 | Coagulation       | 0.21 | P00740     | Coagulation       | 0.38 | P01008     | Coagulation       | 0.35 | P00748     | Coagulation       | 0.32 |
| P01024     | Complement system | 2.44 | P04196     | Coagulation       | 0.13 | P00740     | Coagulation       | 0.20 | P01042     | Coagulation       | 0.26 | P01042     | Coagulation       | 0.33 | P01008     | Coagulation       | 0.28 |
| Q03591     | Complement system | 1.90 | P01024     | Complement system | 2.38 | P20851     | Coagulation       | 0.18 | A0A0A0MRJ7 | Coagulation       | 0.19 | A0A0A0MRJ7 | Coagulation       | 0.32 | A0A0A0MRJ7 | Coagulation       | 0.23 |
| A0A0A0MSV6 | Complement system | 1.76 | A0A0A0MSV6 | Complement system | 2.02 | P00748     | Coagulation       | 0.11 | P05546     | Coagulation       | 0.10 | P00740     | Coagulation       | 0.21 | P05546     | Coagulation       | 0.21 |
| P02747     | Complement system | 1.58 | Q03591     | Complement system | 1.98 | P05546     | Coagulation       | 0.09 | P00742     | Coagulation       | 0.10 | P03951     | Coagulation       | 0.19 | P20851     | Coagulation       | 0.21 |
| B4DPQ0     | Complement system | 1.33 | P02747     | Complement system | 1.40 | H0YAC1     | Coagulation       | 0.03 | P20851     | Coagulation       | 0.09 | P05546     | Coagulation       | 0.19 | P00740     | Coagulation       | 0.19 |
| P04003     | Complement system | 1.31 | P0C0L5     | Complement system | 0.86 | P01024     | Complement system | 5.12 | P00748     | Coagulation       | 0.08 | P20851     | Coagulation       | 0.19 | P03951     | Coagulation       | 0.16 |
| P09871     | Complement system | 0.90 | B4DPQ0     | Complement system | 0.72 | P0C0L5     | Complement system | 2.21 | H0YAC1     | Coagulation       | 0.03 | H0YAC1     | Coagulation       | 0.18 | H0YAC1     | Coagulation       | 0.07 |
| P0C0L5     | Complement system | 0.84 | P08603     | Complement system | 0.52 | A0A0A0MSV6 | Complement system | 1.59 | P01024     | Complement system | 5.01 | P00748     | Coagulation       | 0.11 | P04275     | Coagulation       | 0.01 |
| P08603     | Complement system | 0.68 | P09871     | Complement system | 0.40 | Q03591     | Complement system | 1.23 | P0C0L5     | Complement system | 2.51 | P04275     | Coagulation       | 0.02 | P01024     | Complement system | 3.68 |
| F5GY80     | Complement system | 0.60 | P07360     | Complement system | 0.39 | P08603     | Complement system | 1.01 | A0A0A0MSV6 | Complement system | 2.32 | P01024     | Complement system | 3.91 | P08603     | Complement system | 2.08 |
| Q9BXR6     | Complement system | 0.28 | P04003     | Complement system | 0.38 | F5GY80     | Complement system | 0.86 | P08603     | Complement system | 1.40 | P0C0L5     | Complement system | 2.54 | P0C0L5     | Complement system | 1.91 |
| B4E1Z4     | Complement system | 0.16 | P01031     | Complement system | 0.19 | P07360     | Complement system | 0.82 | P07360     | Complement system | 1.28 | A0A0A0MSV6 | Complement system | 1.69 | P04003     | Complement system | 1.88 |
| P02748     | Complement system | 0.14 | B4E1Z4     | Complement system | 0.14 | P04003     | Complement system | 0.80 | Q03591     | Complement system | 1.17 | P04003     | Complement system | 1.36 | A0A0A0MSV6 | Complement system | 1.77 |
| P01031     | Complement system | 0.12 | F5GY80     | Complement system | 0.13 | B4DPQ0     | Complement system | 0.80 | P04003     | Complement system | 1.03 | P02745     | Complement system | 1.16 | B4DPQ0     | Complement system | 1.12 |
| P07357     | Complement system | 0.07 | P02748     | Complement system | 0.12 | P02748     | Complement system | 0.72 | B4DPQ0     | Complement system | 1.01 | P08603     | Complement system | 0.98 | Q03591     | Complement system | 0.88 |
| P10643     | Complement system | 0.04 | P07357     | Complement system | 0.11 | P02747     | Complement system | 0.66 | P01031     | Complement system | 0.65 | P01031     | Complement system | 0.95 | P02745     | Complement system | 0.78 |
| A0A075B6K9 | Immunoglobulins   | 4.77 | P10643     | Complement system | 0.08 | P02745     | Complement system | 0.65 | P02748     | Complement system | 0.57 | Q03591     | Complement system | 0.86 | P09871     | Complement system | 0.75 |
| P01767     | Immunoglobulins   | 4.10 | P01767     | Immunoglobulins   | 3.64 | P01031     | Complement system | 0.58 | P09871     | Complement system | 0.57 | F5GY80     | Complement system | 0.72 | P02748     | Complement system | 0.64 |
| P01619     | Immunoglobulins   | 2.95 | A0A0B4J1X5 | Immunoglobulins   | 3.35 | A0A087X232 | Complement system | 0.50 | P02747     | Complement system | 0.56 | B4DPQ0     | Complement system | 0.71 | P02747     | Complement system | 0.63 |
| P01625     | Immunoglobulins   | 2.55 | A0A075B6K9 | Immunoglobulins   | 2.71 | P10643     | Complement system | 0.45 | P02745     | Complement system | 0.55 | P02747     | Complement system | 0.70 | P07357     | Complement system | 0.61 |
| P01608     | Immunoglobulins   | 1.76 | P01619     | Immunoglobulins   | 2.61 | P07357     | Complement system | 0.30 | F5GY80     | Complement system | 0.53 | P07360     | Complement system | 0.63 | P07360     | Complement system | 0.59 |
| P04208     | Immunoglobulins   | 1.76 | P01714     | Immunoglobulins   | 1.64 | B4E1Z4     | Complement system | 0.10 | P07357     | Complement system | 0.35 | P02748     | Complement system | 0.59 | P10643     | Complement system | 0.46 |
| A0A0C4DH36 | Immunoglobulins   | 1.56 | P01597     | Immunoglobulins   | 1.59 | P13671     | Complement system | 0.06 | P10643     | Complement system | 0.26 | P09871     | Complement system | 0.46 | P01031     | Complement system | 0.45 |
| D6RD17     | Immunoglobulins   | 1.42 | P01608     | Immunoglobulins   | 1.57 | P01597     | Immunoglobulins   | 5.62 | P13671     | Complement system | 0.11 | P07357     | Complement system | 0.32 | P13671     | Complement system | 0.33 |
| P01876     | Immunoglobulins   | 1.35 | P04208     | Immunoglobulins   | 1.57 | A0A075B6K9 | Immunoglobulins   | 3.98 | B4E1Z4     | Complement system | 0.10 | P10643     | Complement system | 0.27 | B4E1Z4     | Complement system | 0.05 |
| P01714     | Immunoglobulins   | 1.01 | P01625     | Immunoglobulins   | 1.40 | P01767     | Immunoglobulins   | 2.26 | P01597     | Immunoglobulins   | 4.43 | P13671     | Complement system | 0.24 | P01597     | Immunoglobulins   | 3.88 |



|            |                         |      |            |                         |       |            |                         |      |            |                         |      |            |                   |      |            |                 |      |
|------------|-------------------------|------|------------|-------------------------|-------|------------|-------------------------|------|------------|-------------------------|------|------------|-------------------|------|------------|-----------------|------|
| P80748     | Immunoglobulins         | 0.95 | A0A0C4DH36 | Immunoglobulins         | 1.38  | P01876     | Immunoglobulins         | 2.21 | A0A075B6K9 | Immunoglobulins         | 3.06 | B4E1Z4     | Complement system | 0.09 | P01876     | Immunoglobulins | 2.15 |
| A0A0C4DH72 | Immunoglobulins         | 0.87 | A0A0J9YX35 | Immunoglobulins         | 1.37  | P01608     | Immunoglobulins         | 1.60 | P01876     | Immunoglobulins         | 2.58 | P48740     | Complement system | 0.06 | A0A075B6K9 | Immunoglobulins | 1.98 |
| A0A0J9YX35 | Immunoglobulins         | 0.86 | P01876     | Immunoglobulins         | 0.99  | P01625     | Immunoglobulins         | 1.41 | P01619     | Immunoglobulins         | 1.89 | A0A075B6K9 | Immunoglobulins   | 2.79 | P01619     | Immunoglobulins | 1.17 |
| P02649     | Lipoproteins            | 5.20 | P80748     | Immunoglobulins         | 0.85  | A0A0C4DH72 | Immunoglobulins         | 1.38 | P01767     | Immunoglobulins         | 1.72 | P01597     | Immunoglobulins   | 2.68 | P01767     | Immunoglobulins | 1.83 |
| P02647     | Lipoproteins            | 4.73 | A0A0C4DH72 | Immunoglobulins         | 0.77  | P01619     | Immunoglobulins         | 0.99 | P01625     | Immunoglobulins         | 1.64 | P01619     | Immunoglobulins   | 1.72 | P01625     | Immunoglobulins | 1.78 |
| K7ER19     | Lipoproteins            | 2.98 | P06331     | Immunoglobulins         | 0.57  | P04208     | Immunoglobulins         | 0.97 | A0A0C4DH72 | Immunoglobulins         | 1.62 | P01767     | Immunoglobulins   | 1.56 | A0A0B4J1X5 | Immunoglobulins | 1.37 |
| P02749     | Lipoproteins            | 2.49 | D6RD17     | Immunoglobulins         | 0.22  | P80748     | Immunoglobulins         | 0.52 | P01608     | Immunoglobulins         | 1.13 | P01876     | Immunoglobulins   | 1.53 | P01608     | Immunoglobulins | 1.08 |
| P06727     | Lipoproteins            | 1.07 | P02649     | Lipoproteins            | 6.89  | A0A0B4J2D9 | Immunoglobulins         | 0.49 | A0A0B4J2D9 | Immunoglobulins         | 1.01 | P01625     | Immunoglobulins   | 1.49 | A0A0C4DH72 | Immunoglobulins | 0.62 |
| P55056     | Lipoproteins            | 0.31 | P02647     | Lipoproteins            | 6.76  | A0A0C4DH36 | Immunoglobulins         | 0.48 | P01703     | Immunoglobulins         | 0.69 | A0A0C4DH72 | Immunoglobulins   | 1.47 | A0A075B6R9 | Immunoglobulins | 0.99 |
| O14791     | Lipoproteins            | 0.20 | K7ER19     | Lipoproteins            | 4.71  | A0A075B6R9 | Immunoglobulins         | 0.47 | P01714     | Immunoglobulins         | 0.65 | A0A0B4J1X5 | Immunoglobulins   | 1.45 | P01714     | Immunoglobulins | 0.40 |
| P18428     | Lipoproteins            | 0.16 | P02749     | Lipoproteins            | 2.21  | P06331     | Immunoglobulins         | 0.35 | P04208     | Immunoglobulins         | 0.62 | P01608     | Immunoglobulins   | 1.03 | P04208     | Immunoglobulins | 0.39 |
| A0A087WTM7 | Lipoproteins            | 0.09 | P55056     | Lipoproteins            | 1.75  | P02647     | Lipoproteins            | 6.59 | P80748     | Immunoglobulins         | 0.62 | P01714     | Immunoglobulins   | 0.59 | P80748     | Immunoglobulins | 0.38 |
| P02787     | Other Plasma components | 4.97 | P06727     | Lipoproteins            | 1.32  | P02649     | Lipoproteins            | 4.28 | A0A075B6R9 | Immunoglobulins         | 0.55 | P04208     | Immunoglobulins   | 0.57 | P01612     | Immunoglobulins | 0.38 |
| F5H423     | Other Plasma components | 1.01 | P18428     | Lipoproteins            | 0.15  | K7ER19     | Lipoproteins            | 2.95 | P06331     | Immunoglobulins         | 0.41 | P80748     | Immunoglobulins   | 0.56 | A0A0B4J2D9 | Immunoglobulins | 0.35 |
| H0YH81     | Other Plasma components | 0.71 | O14791     | Lipoproteins            | 0.09  | P06727     | Lipoproteins            | 1.25 | A0A0C4DH36 | Immunoglobulins         | 0.24 | A0A0B4J2D9 | Immunoglobulins   | 0.52 | A0A0C4DH36 | Immunoglobulins | 0.35 |
| P68871     | Other Plasma components | 0.65 | P02787     | Other Plasma components | 3.63  | P02749     | Lipoproteins            | 1.01 | P02647     | Lipoproteins            | 4.89 | A0A075B6R9 | Immunoglobulins   | 0.50 | P06331     | Immunoglobulins | 0.25 |
| P02790     | Other Plasma components | 0.60 | C9JC84     | Other Plasma components | 1.98  | V9GYE3     | Lipoproteins            | 0.52 | P02649     | Lipoproteins            | 2.53 | A0A0C4DH36 | Immunoglobulins   | 0.48 | D6RD17     | Immunoglobulins | 0.60 |
| P04217     | Other Plasma components | 0.46 | P68871     | Other Plasma components | 1.00  | P18428     | Lipoproteins            | 0.47 | V9GYE3     | Lipoproteins            | 1.79 | P06331     | Immunoglobulins   | 0.37 | P01717     | Immunoglobulins | 0.54 |
| P25311     | Other Plasma components | 0.43 | P61626     | Other Plasma components | 0.60  | P55056     | Lipoproteins            | 0.40 | K7ER19     | Lipoproteins            | 0.96 | P01717     | Immunoglobulins   | 0.24 | V9GYC1     | Lipoprotein     | 0.73 |
| P27169     | Other Plasma components | 0.36 | P25311     | Other Plasma components | 0.54  | P04114     | Lipoproteins            | 0.17 | P06727     | Lipoproteins            | 0.81 | P01612     | Immunoglobulins   | 0.23 | P02647     | Lipoproteins    | 5.48 |
| P05154     | Other Plasma components | 0.31 | P02790     | Other Plasma components | 0.43  | O14791     | Lipoproteins            | 0.11 | P02749     | Lipoproteins            | 0.68 | D6RD17     | Immunoglobulins   | 0.14 | P02649     | Lipoproteins    | 3.08 |
| Q08380     | Other Plasma components | 0.28 | P05154     | Other Plasma components | 0.28  | P02787     | Other Plasma components | 2.74 | P18428     | Lipoproteins            | 0.46 | P02652     | lipoprotein       | 0.60 | K7ER19     | Lipoproteins    | 2.12 |
| Q02413     | Other Plasma components | 0.16 | Q08380     | Other Plasma components | 0.25  | P27169     | Other Plasma components | 1.17 | P55056     | Lipoproteins            | 0.46 | P02647     | Lipoproteins      | 5.19 | P02749     | Lipoproteins    | 1.50 |
| P43652     | Other Plasma components | 0.13 | P04217     | Other Plasma components | 0.22  | C9JC84     | Other Plasma components | 0.97 | P02787     | Other Plasma components | 2.99 | P02649     | Lipoproteins      | 3.04 | P18428     | Lipoproteins    | 0.77 |
| P36955     | Other Plasma components | 0.09 | H0YH81     | Other Plasma components | 0.22  | Q5T985     | Other Plasma components | 0.81 | P68871     | Other Plasma components | 1.63 | K7ER19     | Lipoproteins      | 1.74 | P06727     | Lipoproteins    | 0.35 |
| Q96P63     | Other Plasma components | 0.09 | P01019     | Other Plasma components | 0.15  | P02790     | Other Plasma components | 0.76 | P27169     | Other Plasma components | 1.36 | P02749     | Lipoproteins      | 1.46 | P55056     | Lipoproteins    | 0.28 |
| P01019     | Other Plasma components | 0.08 | Q02413     | Other Plasma components | 0.07  | P25311     | Other Plasma components | 0.72 | C9JC84     | Other Plasma components | 1.00 | P06727     | Lipoproteins      | 1.16 | A0A087WTM7 | Lipoproteins    | 0.15 |
| D6RAR4     | Other Plasma components | 0.06 | P02768     | Serum albumin           | 11.52 | P68871     | Other Plasma components | 0.62 | P02790     | Other Plasma components | 0.88 | P18428     | Lipoproteins      | 1.01 | O14791     | Lipoproteins    | 0.04 |

|        |                |       |        |                |      |            |                         |      |            |                         |      |            |                         |      |            |                         |       |
|--------|----------------|-------|--------|----------------|------|------------|-------------------------|------|------------|-------------------------|------|------------|-------------------------|------|------------|-------------------------|-------|
| P02768 | Serum albumin  | 12.98 | P04004 | Tissue Leakage | 0.85 | A0A087WW43 | Other Plasma components | 0.57 | Q5T985     | Other Plasma components | 0.77 | P55056     | Lipoproteins            | 0.42 | P02787     | Other Plasma components | 3.62  |
| P04004 | Tissue Leakage | 0.96  |        |                |      | P36955     | Other Plasma components | 0.47 | A0A087WW43 | Other Plasma components | 0.74 | P04114     | Lipoproteins            | 0.37 | C9JC84     | Other Plasma components | 0.99  |
|        |                |       |        |                |      | P61626     | Other Plasma components | 0.37 | P04217     | Other Plasma components | 0.72 | O14791     | Lipoproteins            | 0.12 | P27169     | Other Plasma components | 0.72  |
|        |                |       |        |                |      | P04217     | Other Plasma components | 0.32 | P25311     | Other Plasma components | 0.67 | P02787     | Other Plasma components | 4.75 | P36955     | Other Plasma components | 0.66  |
|        |                |       |        |                |      | Q08380     | Other Plasma components | 0.30 | P36955     | Other Plasma components | 0.45 | P27169     | Other Plasma components | 1.24 | A0A087WW43 | Other Plasma components | 0.56  |
|        |                |       |        |                |      | H0YKS4     | Other Plasma components | 0.28 | P61626     | Other Plasma components | 0.44 | C9JC84     | Other Plasma components | 1.03 | Q5T985     | Other Plasma components | 0.54  |
|        |                |       |        |                |      | P19827     | Other Plasma components | 0.24 | P19827     | Other Plasma components | 0.36 | A0A087WW43 | Other Plasma components | 0.82 | P02790     | Other Plasma components | 0.54  |
|        |                |       |        |                |      | Q13103     | Other Plasma components | 0.21 | P05154     | Other Plasma components | 0.34 | P02790     | Other Plasma components | 0.80 | P25311     | Other Plasma components | 0.52  |
|        |                |       |        |                |      | P01019     | Other Plasma components | 0.20 | Q08380     | Other Plasma components | 0.29 | Q5T985     | Other Plasma components | 0.70 | P68871     | Other Plasma components | 0.45  |
|        |                |       |        |                |      | Q96P63     | Other Plasma components | 0.17 | Q96P63     | Other Plasma components | 0.19 | P68871     | Other Plasma components | 0.66 | P61626     | Other Plasma components | 0.41  |
|        |                |       |        |                |      | Q02413     | Other Plasma components | 0.13 | P01019     | Other Plasma components | 0.17 | P04217     | Other Plasma components | 0.57 | H0YKS4     | Other Plasma components | 0.34  |
|        |                |       |        |                |      | H0YH81     | Other Plasma components | 0.13 | P43652     | Other Plasma components | 0.17 | P36955     | Other Plasma components | 0.50 | P04217     | Other Plasma components | 0.27  |
|        |                |       |        |                |      | P05154     | Other Plasma components | 0.11 | Q02413     | Other Plasma components | 0.16 | P05154     | Other Plasma components | 0.42 | P05154     | Other Plasma components | 0.22  |
|        |                |       |        |                |      | P43652     | Other Plasma components | 0.11 | P29622     | Other Plasma components | 0.06 | P19827     | Other Plasma components | 0.37 | Q08380     | Other Plasma components | 0.21  |
|        |                |       |        |                |      | P35858     | Other Plasma components | 0.07 | D6RAR4     | Other Plasma components | 0.04 | Q08380     | Other Plasma components | 0.32 | P19827     | Other Plasma components | 0.17  |
|        |                |       |        |                |      | G3XAP6     | Other Plasma components | 0.06 | P02768     | Serum albumin           | 9.46 | P01019     | Other Plasma components | 0.27 | P01019     | Other Plasma components | 0.14  |
|        |                |       |        |                |      | P15169     | Other Plasma components | 0.04 | P04004     | Tissue Leakage          | 0.44 | P25311     | Other Plasma components | 0.25 | P29622     | Other Plasma components | 0.12  |
|        |                |       |        |                |      | D6RAR4     | Other Plasma components | 0.03 |            |                         |      | P35858     | Other Plasma components | 0.21 | Q02413     | Other Plasma components | 0.11  |
|        |                |       |        |                |      | P02768     | Serum albumin           | 8.65 |            |                         |      | P29622     | Other Plasma components | 0.17 | P35858     | Other Plasma components | 0.11  |
|        |                |       |        |                |      | P04004     | Tissue Leakage          | 0.61 |            |                         |      | P43652     | Other Plasma components | 0.15 | D6RAR4     | Other Plasma components | 0.07  |
|        |                |       |        |                |      |            |                         |      |            |                         |      | Q02413     | Other Plasma components | 0.09 | P43652     | Other Plasma components | 0.05  |
|        |                |       |        |                |      |            |                         |      |            |                         |      | D6RAR4     | Other Plasma components | 0.07 | P15169     | Other Plasma components | 0.03  |
|        |                |       |        |                |      |            |                         |      |            |                         |      | Q96P63     | Other Plasma components | 0.05 | G3XAP6     | Other Plasma components | 0.02  |
|        |                |       |        |                |      |            |                         |      |            |                         |      | P02768     | Serum albumin           | 8.61 | P02768     | Serum albumin           | 11.54 |
|        |                |       |        |                |      |            |                         |      |            |                         |      | P04004     | Tissue Leakage          | 0.27 | P04004     | Tissue Leakage          | 0.44  |

**Table S3.** The abundance of proteins adsorbed on the surface of BMPs. (1: BMP-WT-Plasma. 2: BMP-WT-IgG Plasma. 3: BMP-RA-TZ-Plasma. 4: BMP-RA-TZ-IgG Plasma. 5: BMP-GA-TZ-Plasma. 6: BMP-GA-TZ-IgG Plasma)

| Accession  | Peptide count | Unique peptides | Abundance |          |          |          |           |           | MW (kDa) |
|------------|---------------|-----------------|-----------|----------|----------|----------|-----------|-----------|----------|
|            |               |                 | 1         | 2        | 3        | 4        | 5         | 6         |          |
| D6RD17     | 3             | 3               | 10995719  | 10270106 | 3779300  | 1691857  | 1475346   | 2506759.4 | 18.02    |
| Q03591     | 11            | 7               | 2.33E+08  | 1.39E+08 | 1.23E+08 | 56009122 | 22872602  | 61761354  | 37.651   |
| P03951     | 14            | 14              | 85313620  | 43212534 | 19913518 | 7515352  | 10147166  | 12013079  | 70.109   |
| Q96P63     | 3             | 3               | 171933.4  | 119235.1 | 459351.6 | 616040.7 | 757776.08 | 710053.68 | 46.276   |
| H0YKS4     | 3             | 3               | 850392    | 675290.7 | 725618.7 | 338473.1 | 274934.55 | 585278.41 | 19.53    |
| P02647     | 23            | 22              | 4.05E+08  | 4.65E+08 | 4.97E+08 | 3.69E+08 | 406199113 | 363670509 | 30.778   |
| P02649     | 20            | 20              | 4E+08     | 5.13E+08 | 1.78E+08 | 1.45E+08 | 131998056 | 161156630 | 36.154   |
| B4E1Z4     | 9             | 9               | 8366997   | 7306707  | 5651835  | 3099111  | 5034162.3 | 4964534.3 | 140.943  |
| P08603     | 56            | 27              | 32338744  | 38385390 | 80746082 | 89929729 | 114842284 | 323199548 | 139.096  |
| P06727     | 18            | 18              | 22569927  | 21172665 | 15269380 | 12959111 | 15069361  | 14602474  | 45.372   |
| P02760     | 6             | 6               | 1980455   | 359011.2 | 11298608 | 18105440 | 18704461  | 32054086  | 38.999   |
| A0A075B6H6 | 14            | 3               | 1.24E+08  | 2.39E+08 | 1.03E+09 | 1.2E+09  | 1.237E+09 | 1.614E+09 | 11.765   |
| P02751     | 69            | 69              | 85290460  | 56041258 | 4.67E+08 | 5.19E+08 | 548464045 | 675092290 | 272.32   |
| P36955     | 8             | 8               | 16232850  | 6933624  | 13820184 | 17937040 | 29556202  | 21691414  | 46.312   |
| P0C0L5     | 88            | 3               | 8379510   | 6550470  | 1.27E+08 | 1.05E+08 | 211346259 | 215495797 | 192.751  |
| E9PGN7     | 13            | 13              | 21508341  | 58073804 | 86785933 | 85678510 | 167735889 | 171783740 | 59.492   |
| P18428     | 15            | 15              | 15754868  | 24355437 | 29400315 | 26918525 | 182106054 | 150433609 | 53.384   |
| P01011     | 9             | 9               | 19537157  | 20490584 | 34153282 | 33154317 | 55975667  | 35450678  | 47.651   |
| P07360     | 7             | 7               | 4625217   | 3989958  | 8391912  | 7202792  | 11674953  | 10431303  | 22.277   |
| P04211     | 2             | 2               | 7830050   | 9483029  | 2942838  | 3064558  | 2862100.9 | 2265559.6 | 12.451   |
| P04003     | 31            | 31              | 1.49E+08  | 59870934 | 3.17E+08 | 3.24E+08 | 383883957 | 716502265 | 67.033   |
| A0A0C4DH72 | 4             | 2               | 4510838   | 10197764 | 63438805 | 83668386 | 75743464  | 68457307  | 12.697   |
| A0A0J9YX35 | 4             | 2               | 8653137   | 6584679  | 1033802  | 933972.2 | 726639.74 | 1138783   | 12.823   |
| P01767     | 5             | 3               | 2883029   | 3278929  | 6098663  | 6064457  | 6341915.3 | 6504914.7 | 12.77    |
| P02745     | 7             | 7               | 5451180   | 7385594  | 73377262 | 50198043 | 96604346  | 173121180 | 26.017   |
| P04196     | 11            | 11              | 9569258   | 4940175  | 17877996 | 18282942 | 28631603  | 19680103  | 59.578   |
| P07357     | 14            | 13              | 8659554   | 6091221  | 11148504 | 10024353 | 16492490  | 22133623  | 65.163   |
| P20851     | 2             | 2               | 606540.1  | 1042598  | 900523.1 | 1067788  | 1314629.7 | 2189831.2 | 28.357   |
| P01023     | 60            | 54              | 1.41E+08  | 1.41E+08 | 2.27E+08 | 2.01E+08 | 332592060 | 250448781 | 163.291  |
| C9JC84     | 21            | 15              | 78755615  | 92570560 | 55724325 | 33081165 | 51727027  | 59239164  | 52.338   |
| A0A0A0MSV6 | 9             | 9               | 1.1E+08   | 1.36E+08 | 1.64E+08 | 1.4E+08  | 279926740 | 343493927 | 24.031   |
| Q5T985     | 25            | 18              | 6632853   | 18642611 | 1.26E+08 | 1.31E+08 | 140033608 | 120923802 | 105.216  |
| P01717     | 2             | 2               | 4011283   | 4357370  | 1752718  | 701420.1 | 870131.44 | 2706177.7 | 12.011   |
| Q08380     | 9             | 9               | 12915916  | 14784516 | 3.03E+08 | 2.29E+08 | 257686373 | 370354913 | 65.331   |
| G5E9F8     | 15            | 15              | 9484987   | 6958245  | 43743417 | 39268735 | 42890762  | 43347381  | 73.474   |
| F5GY80     | 19            | 19              | 14781115  | 8154550  | 25267778 | 19693247 | 36607471  | 38502330  | 60.041   |
| P00450     | 39            | 38              | 30246540  | 27953236 | 1.69E+08 | 1.67E+08 | 154759768 | 142838105 | 122.205  |

|            |     |     |          |          |          |          |           |           |         |
|------------|-----|-----|----------|----------|----------|----------|-----------|-----------|---------|
| P13671     | 15  | 13  | 6209131  | 7583035  | 9153628  | 8291574  | 12531568  | 21723963  | 104.786 |
| P00734     | 32  | 31  | 41144238 | 22249149 | 2.91E+08 | 2.39E+08 | 208306821 | 479651961 | 70.037  |
| Q02413     | 7   | 7   | 2698727  | 5144971  | 6544393  | 8028252  | 5932440.1 | 9454370.4 | 113.748 |
| A0A0C4DH36 | 4   | 3   | 4006072  | 1460310  | 555136.9 | 467962.6 | 360290.48 | 743068.25 | 12.759  |
| P01031     | 47  | 47  | 44228163 | 42059754 | 1.55E+08 | 1.16E+08 | 144181258 | 147510369 | 188.305 |
| P01619     | 4   | 2   | 19117566 | 29897590 | 16147852 | 14197893 | 15364453  | 16658759  | 12.557  |
| P02748     | 14  | 14  | 5283624  | 21477752 | 53706956 | 44347433 | 48967670  | 84388554  | 63.173  |
| P27169     | 11  | 11  | 6837218  | 11484288 | 46780046 | 44889129 | 41265040  | 29760835  | 39.731  |
| F5H423     | 4   | 4   | 56841469 | 2718308  | 499780.1 | 499015.6 | 547422.71 | 527278.98 | 23.346  |
| P06331     | 3   | 2   | 24709326 | 27130153 | 11851559 | 10710092 | 14609139  | 14304040  | 13.815  |
| P19827     | 13  | 12  | 17305785 | 3193317  | 32969285 | 34911786 | 36446273  | 31441663  | 101.389 |
| P43652     | 3   | 3   | 634521.5 | 1466216  | 1803189  | 1664778  | 2250346.9 | 1902437.4 | 69.069  |
| P01597     | 6   | 3   | 2033866  | 2106680  | 3034041  | 2659029  | 2875592.1 | 2986325   | 12.737  |
| A0A087WW43 | 16  | 16  | 34704382 | 4378714  | 42529382 | 43780158 | 58552907  | 53654988  | 75.078  |
| A0A0B4J2D9 | 2   | 2   | 10148919 | 5488021  | 9367626  | 8459144  | 11860130  | 13946294  | 12.569  |
| P01608     | 4   | 2   | 9950133  | 12235495 | 5549965  | 5561145  | 7080312.3 | 6326544.4 | 12.848  |
| H0YH81     | 4   | 4   | 4.35E+08 | 16061949 | 2330951  | 4327375  | 2310698.5 | 3337326   | 38.25   |
| P68871     | 3   | 3   | 1141193  | 1752822  | 1711376  | 1215497  | 1314305.4 | 1228200.1 | 15.998  |
| P02790     | 15  | 14  | 65652933 | 40139853 | 61268613 | 55962177 | 77296346  | 75741731  | 51.676  |
| P80748     | 3   | 2   | 19819195 | 26570546 | 37728992 | 30109116 | 15712833  | 14062361  | 12.466  |
| P01714     | 3   | 3   | 7737873  | 10745239 | 4496700  | 5403171  | 5317677.7 | 5295243.4 | 12.042  |
| P05109     | 3   | 3   | 108005.4 | 270993.8 | 1297987  | 876867.9 | 661317.57 | 870153.82 | 10.835  |
| P04275     | 2   | 2   | 211947.2 | 2443.662 | 104603.7 | 101001.1 | 201921.91 | 434213.57 | 309.265 |
| H0YAC1     | 10  | 10  | 30899455 | 18244539 | 6195099  | 7278908  | 9761677.2 | 9162986.1 | 76.885  |
| P02675     | 25  | 25  | 2.95E+08 | 2.37E+08 | 1.91E+08 | 1.8E+08  | 213256848 | 216552223 | 55.928  |
| P00748     | 6   | 6   | 20189757 | 12385077 | 6062511  | 4984848  | 8337938.7 | 9426072.9 | 67.792  |
| O43866     | 15  | 15  | 2.58E+08 | 1.35E+08 | 30098743 | 36199325 | 36679452  | 77790680  | 38.088  |
| A0A0A0MRJ7 | 36  | 36  | 1.06E+08 | 1.58E+08 | 42893630 | 43411801 | 65468787  | 65072940  | 248.983 |
| P01019     | 5   | 5   | 2018066  | 2272718  | 5634525  | 3480554  | 5460737.3 | 4325759.7 | 53.154  |
| P55056     | 4   | 4   | 8863111  | 13483460 | 3195286  | 2244142  | 7017156.4 | 4076710.2 | 14.553  |
| P00740     | 7   | 7   | 2033964  | 265782.8 | 3897022  | 2787262  | 3036814.1 | 3544694   | 51.778  |
| P02787     | 53  | 52  | 1.02E+09 | 5.06E+08 | 4.1E+08  | 2.97E+08 | 512045003 | 483945976 | 77.064  |
| P05546     | 6   | 6   | 1303985  | 454866.1 | 2017139  | 2047562  | 1998302.4 | 1296709.1 | 57.071  |
| P01024     | 122 | 108 | 6.44E+08 | 7.46E+08 | 2.12E+09 | 1.72E+09 | 1.348E+09 | 1.452E+09 | 187.148 |
| P10909     | 13  | 13  | 10595050 | 8161319  | 64297310 | 43092486 | 29631328  | 33192387  | 52.495  |
| O14791     | 2   | 2   | 93496.46 | 6364224  | 1805860  | 224145.7 | 33060.332 | 1063404.2 | 43.974  |
| P04004     | 12  | 12  | 1.67E+08 | 91250187 | 1.04E+08 | 86573875 | 99370636  | 102310814 | 54.306  |
| P15169     | 2   | 2   | 0        | 223548.4 | 219647.9 | 403486.8 | 226690.43 | 147789.36 | 52.286  |
| P10643     | 15  | 15  | 26809917 | 6215396  | 18261374 | 15442931 | 28347662  | 29518190  | 93.518  |
| P04208     | 3   | 2   | 7269406  | 20557781 | 5493081  | 6740965  | 10400789  | 1286116   | 12.284  |
| P01625     | 5   | 2   | 412777.7 | 25912313 | 27891237 | 26139903 | 27663329  | 24504441  | 13.38   |
| P00747     | 31  | 31  | 46701193 | 53360942 | 74471285 | 67979528 | 52722500  | 105620343 | 90.569  |
| P02749     | 16  | 13  | 2.53E+09 | 1.65E+09 | 2.83E+08 | 2.1E+08  | 418049233 | 1.238E+09 | 38.298  |
| P08697     | 5   | 5   | 4075726  | 19479584 | 3433659  | 3532347  | 4235385.4 | 3858941.9 | 54.566  |
| Q96PD5     | 2   | 2   | 81156.16 | 365370.5 | 432207.8 | 317522.9 | 466592.57 | 394665.82 | 62.217  |
| K7ER19     | 4   | 4   | 4312640  | 13170654 | 10214191 | 6226826  | 17531917  | 22014263  | 8.647   |
| P02671     | 31  | 31  | 1.88E+08 | 1.55E+08 | 1.4E+08  | 1.2E+08  | 160407889 | 150256692 | 94.973  |

|            |    |    |          |          |          |          |           |           |        |
|------------|----|----|----------|----------|----------|----------|-----------|-----------|--------|
| P01009     | 26 | 26 | 1.12E+08 | 1.26E+08 | 2.61E+08 | 1.85E+08 | 223604870 | 186070138 | 46.737 |
| P01042     | 19 | 19 | 2.23E+08 | 70174430 | 25961581 | 30907717 | 42351655  | 55744743  | 71.957 |
| A0A075B6R9 | 3  | 2  | 3890674  | 1253012  | 4911465  | 4008758  | 3549171.9 | 5414146.7 | 13.079 |
| Q13103     | 2  | 2  | 460588.7 | 766644   | 1378647  | 898085.5 | 317623.28 | 557687.64 | 24.338 |
| P00739     | 14 | 3  | 6077664  | 2137715  | 8133963  | 5379957  | 6507442.4 | 8584826.6 | 39.03  |
| P04217     | 9  | 8  | 3.26E+08 | 4795674  | 6394704  | 6323695  | 9601764.6 | 6009325.4 | 54.254 |
| P01612     | 3  | 3  | 611324.6 | 2708019  | 6300470  | 4068910  | 2248596.2 | 6210568.5 | 12.737 |
| G3XAP6     | 2  | 2  | 22229.34 | 313132   | 1317874  | 688712.6 | 190750.75 | 1333414.8 | 79.697 |
| P61626     | 6  | 6  | 2690249  | 4570205  | 1022900  | 1426072  | 839936.64 | 2958720.5 | 16.537 |
| P02763     | 5  | 3  | 73405.57 | 1752167  | 626322.9 | 736060   | 1325207.9 | 622636.47 | 23.512 |
| P01008     | 13 | 13 | 2596675  | 16428596 | 13734930 | 11812322 | 16292566  | 10120892  | 52.602 |
| J3KNB4     | 2  | 2  | 78011.39 | 3587947  | 254802.6 | 147450.9 | 133330.06 | 372709.06 | 19.591 |
| P01703     | 2  | 2  | 423911.7 | 6873769  | 14793223 | 15769468 | 6880434.1 | 3622917.3 | 12.302 |
| V9GYE3     | 2  | 2  | 830.0366 | 1641198  | 424221.4 | 438635.1 | 113905.95 | 957800.81 | 5.877  |
| P29622     | 3  | 3  | 520386.4 | 763036.1 | 741814.7 | 552279.5 | 942637.23 | 811129.63 | 48.542 |
| P02743     | 5  | 5  | 898030.9 | 4124734  | 5910040  | 3453725  | 4339634   | 3923898.1 | 25.387 |
| P59665     | 2  | 2  | 380577.4 | 1133761  | 591025.1 | 621876.9 | 491633.33 | 1739096.7 | 10.201 |
| P25311     | 8  | 7  | 7559204  | 5308489  | 9096908  | 8785729  | 5390250.8 | 5554223.8 | 34.259 |
| P02765     | 5  | 3  | 602973.4 | 7973098  | 4337254  | 3130203  | 5114221.6 | 3799616.4 | 39.341 |
| P35858     | 2  | 2  | 38126.23 | 222189.3 | 261381.5 | 8556.481 | 252389.28 | 193466.08 | 66.035 |
| D6RAR4     | 4  | 4  | 2468706  | 771284.8 | 436181   | 467992.7 | 520506.73 | 1503618.6 | 71.483 |
| P05154     | 5  | 5  | 9542414  | 7108696  | 1116408  | 1308584  | 5255000.9 | 3950784.2 | 45.675 |
| P02768     | 69 | 63 | 1.02E+10 | 6.25E+09 | 5.95E+09 | 4.36E+09 | 7.359E+09 | 8.662E+09 | 69.367 |
| P01876     | 16 | 5  | 69629284 | 98274506 | 7.06E+08 | 5.95E+08 | 124099757 | 155572671 | 37.655 |
| A0A096LPE2 | 3  | 3  | 599914.1 | 3368787  | 3477118  | 1461102  | 2780068   | 2823523.5 | 23.353 |
| P09871     | 20 | 20 | 89550433 | 93020950 | 83838375 | 75517488 | 94643204  | 106019411 | 76.684 |
| P02747     | 6  | 6  | 4.47E+08 | 3.86E+08 | 3.69E+08 | 2.45E+08 | 544603089 | 580604253 | 25.774 |
| P00738     | 23 | 12 | 79746749 | 52292465 | 71792588 | 50148572 | 75166939  | 70706518  | 45.205 |
| B4DPQ0     | 27 | 27 | 1.56E+08 | 1.23E+08 | 61329590 | 61995554 | 96276532  | 158102588 | 81.89  |
| A0A075B6K9 | 7  | 3  | 41256608 | 971006.3 | 20015920 | 21815068 | 9387199.2 | 6875372.3 | 11.294 |
